# Supplementary material for: Predicting the Impact of Change in Air Quality Patterns Due to COVID-19 Lockdown Policies in Multiple Urban Cities of Henan: A Deep Learning Approach
Source: MDPI journal article supplement (doi:10.3390/atmos14050902), 2023-05-22
Supplement: s1 [file s1]

# Supplementary Materials

Mughair Aslam Bhatti <sup>1,2</sup>, Zhiyao Song <sup>1,\*</sup>, Uzair Aslam Bhatti <sup>3</sup> and Naushad Ahmad <sup>4</sup>

**Table S1.** Stations with locations.

| Station Name | City         | Log      | Lat     |
|--------------|--------------|----------|---------|
| 1811A        | Luoyang      | 112.3628 | 34.6692 |
| 1812A        | Luoyang      | 112.3931 | 34.6516 |
| 1813A        | Luoyang      | 112.4333 | 34.67   |
| 1814A        | Luoyang      | 112.4657 | 34.6871 |
| 1815A        | Luoyang      | 112.494  | 34.6886 |
| 1816A        | Luoyang      | 112.3844 | 34.623  |
| 1817A        | Luoyang      | 112.4267 | 34.6258 |
| 1818A        | Anyang       | 114.4839 | 36.0621 |
| 1819A        | Anyang       | 114.3551 | 36.1017 |
| 1820A        | Anyang       | 114.361  | 36.0681 |
| 1821A        | Anyang       | 114.3931 | 36.0883 |
| 1822A        | Anyang       | 114.286  | 36.11   |
| 1823A        | Kaifeng      | 114.3406 | 34.8022 |
| 1824A        | Kaifeng      | 114.3389 | 34.7781 |
| 1825A        | Kaifeng      | 114.3733 | 34.7975 |
| 1826A        | Kaifeng      | 114.2885 | 34.7965 |
| 1827A        | Jiaozuo      | 113.261  | 35.235  |
| 1828A        | Jiaozuo      | 113.2269 | 35.2127 |
| 1829A        | Jiaozuo      | 113.2467 | 35.176  |
| 1830A        | Jiaozuo      | 113.1987 | 35.2703 |
| 1831A        | Pingdingshan | 113.3064 | 33.7214 |
| 1832A        | Pingdingshan | 113.3257 | 33.742  |
| 1833A        | Pingdingshan | 113.2919 | 33.737  |
| 1834A        | Pingdingshan | 113.182  | 33.774  |
| 1835A        | Sanmenxia    | 111.1922 | 34.7752 |
| 1836A        | Sanmenxia    | 111.1587 | 34.7942 |
| 1837A        | Sanmenxia    | 111.1858 | 34.7917 |
| 1838A        | Sanmenxia    | 111.143  | 34.7955 |
| 2054A        | Xinyang      | 114.1099 | 32.1059 |
| 2064A        | Xinyang      | 113.9956 | 32.1271 |
| 2065A        | Xinyang      | 114.0775 | 32.1195 |
| 2066A        | Xinyang      | 114.0609 | 32.1399 |
| 2067A        | Zhoukou      | 114.6613 | 33.6128 |
| 2068A        | Zhoukou      | 114.6758 | 33.6347 |
| 2069A        | Zhoukou      | 114.6546 | 33.5979 |
| 2070A        | Zhoukou      | 114.6369 | 33.6406 |
| 2385A        | Hebi         | 114.17   | 35.9019 |
| 2386A        | Hebi         | 114.2956 | 35.7511 |
| 2387A        | Hebi         | 114.2878 | 35.7306 |
| 2388A        | Xinxiang     | 113.926  | 35.279  |
| 2389A        | Xinxiang     | 113.836  | 35.31   |
| 2390A        | Xinxiang     | 113.884  | 35.272  |
| 2391A        | Xinxiang     | 113.883  | 35.303  |
| 2392A        | Puyang       | 115.0312 | 35.7636 |
| 2393A        | Puyang       | 114.9906 | 35.767  |
| 2394A        | Puyang       | 115.0574 | 35.7609 |

|       |           |          |         |
|-------|-----------|----------|---------|
| 2395A | Puyang    | 115.0866 | 35.7754 |
| 2396A | Xuchang   | 113.8276 | 34.0159 |
| 2397A | Xuchang   | 113.8208 | 34.0314 |
| 2398A | Xuchang   | 113.7906 | 33.9953 |
| 2399A | Luohe     | 114.051  | 33.5699 |
| 2400A | Luohe     | 114.0055 | 33.5698 |
| 2401A | Luohe     | 114.0138 | 33.5828 |
| 2402A | Luohe     | 114.0261 | 33.5698 |
| 2403A | Nanyang   | 112.5192 | 32.9917 |
| 2404A | Nanyang   | 112.5339 | 33.0086 |
| 2405A | Nanyang   | 112.5003 | 32.9735 |
| 2406A | Nanyang   | 112.5779 | 33.0144 |
| 2407A | Nanyang   | 112.548  | 32.9692 |
| 2408A | Shangqiu  | 115.6702 | 34.4285 |
| 2409A | Shangqiu  | 115.6458 | 34.4045 |
| 2410A | Shangqiu  | 115.6293 | 34.3948 |
| 2411A | Shangqiu  | 115.6578 | 34.402  |
| 2420A | ZhuMaDian | 114.0189 | 32.9656 |
| 2421A | ZhuMaDian | 114.0114 | 33.015  |
| 2422A | ZhuMaDian | 113.9976 | 32.9771 |

Table S2. City-wise change of air quality pattern.

| Cities  | Year | AQI    | CO   | NO2   | O3     | PM10   | PM2.5 | SO2   | AQI  | CO   | NO2  | O3   | PM10 | PM2.5 | SO2  |
|---------|------|--------|------|-------|--------|--------|-------|-------|------|------|------|------|------|-------|------|
| Anyang  | 2017 | 118.24 | 1.82 | 46.90 | 65.98  | 140.63 | 81.21 | 28.67 |      |      |      |      |      |       |      |
|         | 2018 | 110.09 | 1.56 | 41.17 | 69.11  | 123.59 | 73.56 | 21.17 | -7%  | -14% | -12% | 5%   | -12% | -9%   | -26% |
|         | 2019 | 108.38 | 1.25 | 38.26 | 69.19  | 117.71 | 70.88 | 15.42 | -2%  | -20% | -7%  | 0%   | -5%  | -4%   | -27% |
|         | 2020 | 103.30 | 1.13 | 36.47 | 64.30  | 110.31 | 67.10 | 12.80 | -5%  | -10% | -5%  | -7%  | -6%  | -5%   | -17% |
|         | 2021 | 67.58  | 0.67 | 18.38 | 104.56 | 75.79  | 29.78 | 6.44  | -35% | -40% | -50% | 63%  | -31% | -56%  | -50% |
| Hebi    | 2017 | 95.67  | 1.65 | 44.56 | 65.79  | 116.22 | 62.29 | 27.46 |      |      |      |      |      |       |      |
|         | 2018 | 91.52  | 1.35 | 42.57 | 73.12  | 112.81 | 55.22 | 18.59 | -4%  | -18% | -4%  | 11%  | -3%  | -11%  | -32% |
|         | 2019 | 93.61  | 0.82 | 36.89 | 65.03  | 100.77 | 60.56 | 12.70 | 2%   | -39% | -13% | -11% | -11% | 10%   | -32% |
|         | 2020 | 91.18  | 0.97 | 37.18 | 61.43  | 95.25  | 59.47 | 11.62 | -3%  | 18%  | 1%   | -6%  | -5%  | -2%   | -9%  |
|         | 2021 | 68.50  | 0.60 | 19.81 | 102.81 | 76.36  | 32.88 | 8.68  | -25% | -38% | -47% | 67%  | -20% | -45%  | -25% |
| Jiaozuo | 2017 | 109.07 | 1.46 | 40.92 | 70.67  | 129.25 | 74.91 | 23.94 |      |      |      |      |      |       |      |
|         | 2018 | 102.32 | 1.17 | 34.73 | 78.31  | 122.01 | 67.04 | 16.18 | -6%  | -20% | -15% | 11%  | -6%  | -11%  | -32% |
|         | 2019 | 95.87  | 0.93 | 33.08 | 75.45  | 109.46 | 60.69 | 12.44 | -6%  | -21% | -5%  | -4%  | -10% | -9%   | -23% |
|         | 2020 | 86.36  | 0.89 | 29.35 | 73.89  | 94.36  | 55.52 | 11.17 | -10% | -4%  | -11% | -2%  | -14% | -9%   | -10% |
|         | 2021 | 63.37  | 0.59 | 13.85 | 112.36 | 64.03  | 28.55 | 8.16  | -27% | -34% | -53% | 52%  | -32% | -49%  | -27% |
| Kaifeng | 2017 | 105.10 | 1.31 | 39.55 | 68.83  | 119.96 | 68.77 | 22.12 |      |      |      |      |      |       |      |
|         | 2018 | 103.90 | 1.08 | 34.39 | 73.63  | 115.80 | 65.59 | 15.77 | -1%  | -18% | -13% | 7%   | -3%  | -5%   | -29% |
|         | 2019 | 102.87 | 1.04 | 34.21 | 71.76  | 108.64 | 67.03 | 11.05 | -1%  | -4%  | -1%  | -3%  | -6%  | 2%    | -30% |
|         | 2020 | 81.44  | 1.20 | 29.22 | 57.51  | 81.13  | 53.87 | 11.46 | -21% | 15%  | -15% | -20% | -25% | -20%  | 4%   |
|         | 2021 | 61.58  | 0.64 | 15.00 | 104.60 | 69.34  | 27.48 | 5.41  | -24% | -47% | -49% | 82%  | -15% | -49%  | -53% |
| Luohe   | 2017 | 98.17  | 1.03 | 37.67 | 64.59  | 117.30 | 64.61 | 16.27 |      |      |      |      |      |       |      |
|         | 2018 | 97.88  | 0.83 | 33.88 | 71.50  | 113.56 | 62.18 | 12.26 | 0%   | -20% | -10% | 11%  | -3%  | -4%   | -25% |
|         | 2019 | 93.51  | 0.73 | 29.66 | 71.80  | 99.55  | 60.10 | 9.85  | -4%  | -12% | -12% | 0%   | -12% | -3%   | -20% |
|         | 2020 | 83.30  | 0.77 | 25.17 | 68.38  | 84.91  | 54.41 | 9.25  | -11% | 6%   | -15% | -5%  | -15% | -9%   | -6%  |
|         | 2021 | 53.89  | 0.59 | 12.55 | 94.41  | 57.08  | 26.51 | 7.73  | -35% | -23% | -50% | 38%  | -33% | -51%  | -16% |
| Luoyang | 2017 | 105.88 | 1.49 | 39.77 | 70.55  | 122.54 | 71.02 | 24.82 |      |      |      |      |      |       |      |
|         | 2018 | 95.80  | 1.25 | 41.04 | 65.69  | 113.45 | 60.68 | 18.33 | -10% | -16% | 3%   | -7%  | -7%  | -15%  | -26% |
|         | 2019 | 97.20  | 0.78 | 38.67 | 64.95  | 110.81 | 61.39 | 10.06 | 1%   | -38% | -6%  | -1%  | -2%  | 1%    | -45% |
|         | 2020 | 82.51  | 0.77 | 33.06 | 62.63  | 90.58  | 51.00 | 8.21  | -15% | -1%  | -14% | -4%  | -18% | -17%  | -18% |
|         | 2021 | 58.47  | 0.63 | 17.46 | 103.16 | 61.16  | 24.99 | 5.93  | -29% | -18% | -47% | 65%  | -32% | -51%  | -28% |
| Nanyang | 2017 | 92.20  | 1.32 | 31.57 | 74.53  | 109.65 | 57.80 | 14.56 |      |      |      |      |      |       |      |

|              |      |        |      |       |        |        |       |       |      |      |      |      |      |      |      |
|--------------|------|--------|------|-------|--------|--------|-------|-------|------|------|------|------|------|------|------|
|              | 2018 | 92.15  | 1.04 | 34.22 | 73.66  | 102.97 | 59.81 | 7.70  | 0%   | -21% | 8%   | -1%  | -6%  | 3%   | -47% |
|              | 2019 | 90.99  | 0.95 | 28.86 | 74.23  | 95.99  | 59.99 | 7.42  | -1%  | -9%  | -16% | 1%   | -7%  | 0%   | -4%  |
|              | 2020 | 80.58  | 0.91 | 24.69 | 70.58  | 85.49  | 51.81 | 7.94  | -11% | -5%  | -14% | -5%  | -11% | -14% | 7%   |
|              | 2021 | 49.87  | 0.77 | 13.93 | 91.84  | 51.28  | 24.98 | 7.37  | -38% | -15% | -44% | 30%  | -40% | -52% | -7%  |
|              | 2017 | 101.80 | 1.23 | 38.52 | 73.01  | 119.34 | 68.44 | 23.65 |      |      |      |      |      |      |      |
| Pingdingshan | 2018 | 97.77  | 0.97 | 36.41 | 73.48  | 111.09 | 64.88 | 17.30 | -4%  | -21% | -5%  | 1%   | -7%  | -5%  | -27% |
|              | 2019 | 99.51  | 0.96 | 34.80 | 71.45  | 104.64 | 64.56 | 12.38 | 2%   | -1%  | -4%  | -3%  | -6%  | -1%  | -28% |
|              | 2020 | 76.85  | 0.86 | 30.62 | 71.43  | 83.51  | 49.12 | 11.26 | -23% | -11% | -12% | 0%   | -20% | -24% | -9%  |
|              | 2021 | 54.50  | 0.61 | 18.91 | 93.77  | 56.52  | 27.66 | 6.46  | -29% | -29% | -38% | 31%  | -32% | -44% | -43% |
|              | 2017 | 104.57 | 1.47 | 41.10 | 69.60  | 120.08 | 69.32 | 22.70 |      |      |      |      |      |      |      |
| Puyang       | 2018 | 98.85  | 1.09 | 34.49 | 78.35  | 108.99 | 63.46 | 16.19 | -5%  | -25% | -16% | 13%  | -9%  | -8%  | -29% |
|              | 2019 | 84.59  | 0.67 | 29.04 | 72.31  | 95.72  | 53.41 | 13.04 | -14% | -39% | -16% | -8%  | -12% | -16% | -19% |
|              | 2020 | 91.55  | 0.81 | 31.31 | 67.30  | 92.04  | 59.37 | 10.03 | 8%   | 21%  | 8%   | -7%  | -4%  | 11%  | -23% |
|              | 2021 | 64.34  | 0.57 | 15.98 | 101.96 | 72.69  | 30.83 | 6.12  | -30% | -30% | -49% | 52%  | -21% | -48% | -39% |
|              | 2017 | 99.32  | 1.19 | 38.81 | 66.73  | 111.06 | 64.85 | 22.60 |      |      |      |      |      |      |      |
| Sanmenxia    | 2018 | 94.82  | 0.95 | 34.53 | 71.34  | 109.07 | 57.12 | 13.66 | -5%  | -20% | -11% | 7%   | -2%  | -12% | -40% |
|              | 2019 | 89.96  | 0.88 | 31.42 | 65.27  | 93.54  | 56.60 | 9.87  | -5%  | -7%  | -9%  | -9%  | -14% | -1%  | -28% |
|              | 2020 | 76.40  | 0.81 | 28.17 | 62.71  | 74.45  | 46.81 | 7.35  | -15% | -8%  | -10% | -4%  | -20% | -17% | -25% |
|              | 2021 | 58.81  | 0.62 | 17.66 | 102.53 | 63.30  | 25.95 | 5.53  | -23% | -24% | -37% | 63%  | -15% | -45% | -25% |
|              | 2017 | 97.37  | 0.88 | 35.37 | 70.69  | 117.06 | 62.92 | 13.68 |      |      |      |      |      |      |      |
| Shangqiu     | 2018 | 97.19  | 0.92 | 32.55 | 72.93  | 110.37 | 61.80 | 9.70  | 0%   | 5%   | -8%  | 3%   | -6%  | -2%  | -29% |
|              | 2019 | 89.48  | 0.77 | 29.68 | 73.58  | 94.33  | 56.12 | 9.80  | -8%  | -17% | -9%  | 1%   | -15% | -9%  | 1%   |
|              | 2020 | 82.12  | 0.72 | 26.70 | 69.33  | 79.79  | 52.62 | 7.16  | -8%  | -7%  | -10% | -6%  | -15% | -6%  | -27% |
|              | 2021 | 57.66  | 0.58 | 12.14 | 98.51  | 62.57  | 26.36 | 5.39  | -30% | -19% | -55% | 42%  | -22% | -50% | -25% |
|              | 2017 | 102.77 | 1.49 | 49.14 | 64.85  | 122.05 | 68.78 | 28.33 |      |      |      |      |      |      |      |
| Xinxiang     | 2018 | 96.72  | 1.22 | 46.41 | 72.73  | 112.17 | 62.27 | 18.63 | -6%  | -18% | -6%  | 12%  | -8%  | -9%  | -34% |
|              | 2019 | 90.64  | 1.04 | 42.87 | 63.00  | 104.10 | 56.45 | 16.12 | -6%  | -15% | -8%  | -13% | -7%  | -9%  | -13% |
|              | 2020 | 82.81  | 0.92 | 33.77 | 64.30  | 93.03  | 51.97 | 12.70 | -9%  | -12% | -21% | 2%   | -11% | -8%  | -21% |
|              | 2021 | 65.15  | 0.70 | 19.49 | 104.82 | 71.39  | 30.45 | 9.36  | -21% | -24% | -42% | 63%  | -23% | -41% | -26% |
|              | 2017 | 79.40  | 0.82 | 27.32 | 66.40  | 89.95  | 51.81 | 12.63 |      |      |      |      |      |      |      |
| Xinyang      | 2018 | 82.61  | 0.77 | 26.02 | 78.50  | 93.14  | 53.13 | 8.52  | 4%   | -6%  | -5%  | 18%  | 4%   | 3%   | -33% |
|              | 2019 | 74.61  | 0.61 | 24.33 | 73.63  | 77.47  | 48.26 | 6.60  | -10% | -20% | -6%  | -6%  | -17% | -9%  | -22% |
|              | 2020 | 65.10  | 0.69 | 20.90 | 72.64  | 67.13  | 40.68 | 6.44  | -13% | 13%  | -14% | -1%  | -13% | -16% | -3%  |
|              | 2021 | 41.75  | 0.43 | 10.23 | 83.61  | 38.63  | 21.23 | 6.99  | -36% | -38% | -51% | 15%  | -42% | -48% | 9%   |
|              | 2017 | 99.01  | 1.31 | 41.82 | 68.32  | 109.97 | 65.92 | 22.54 |      |      |      |      |      |      |      |
| Xuchang      | 2018 | 100.24 | 1.12 | 36.82 | 70.49  | 113.53 | 63.33 | 13.31 | 1%   | -14% | -12% | 3%   | 3%   | -4%  | -41% |
|              | 2019 | 93.33  | 1.00 | 33.68 | 69.11  | 93.18  | 60.79 | 11.84 | -7%  | -11% | -9%  | -2%  | -18% | -4%  | -11% |
|              | 2020 | 77.98  | 0.87 | 28.31 | 68.43  | 74.84  | 49.80 | 10.62 | -16% | -12% | -16% | -1%  | -20% | -18% | -10% |
|              | 2021 | 53.89  | 0.72 | 16.03 | 91.48  | 56.05  | 25.82 | 6.26  | -31% | -18% | -43% | 34%  | -25% | -48% | -41% |
|              | 2017 | 93.05  | 1.20 | 33.24 | 72.89  | 107.79 | 61.07 | 16.66 |      |      |      |      |      |      |      |
| Zhoukou      | 2018 | 96.54  | 0.95 | 28.98 | 78.29  | 112.60 | 59.02 | 12.40 | 4%   | -21% | -13% | 7%   | 4%   | -3%  | -26% |
|              | 2019 | 90.37  | 0.81 | 27.51 | 75.16  | 98.41  | 56.85 | 9.94  | -6%  | -15% | -5%  | -4%  | -13% | -4%  | -20% |
|              | 2020 | 85.44  | 0.82 | 26.30 | 66.33  | 82.88  | 55.35 | 9.02  | -5%  | 1%   | -4%  | -12% | -16% | -3%  | -9%  |
|              | 2021 | 52.58  | 0.62 | 11.93 | 89.78  | 57.57  | 23.21 | 6.65  | -38% | -25% | -55% | 35%  | -31% | -58% | -26% |
|              | 2017 | 92.46  | 0.96 | 35.99 | 72.54  | 107.95 | 59.20 | 15.27 |      |      |      |      |      |      |      |
| ZhuMaDian    | 2018 | 92.89  | 0.82 | 33.89 | 75.05  | 108.39 | 59.66 | 12.90 | 0%   | -15% | -6%  | 3%   | 0%   | 1%   | -16% |
|              | 2019 | 84.28  | 0.67 | 27.49 | 71.44  | 92.58  | 54.31 | 7.29  | -9%  | -18% | -19% | -5%  | -15% | -9%  | -44% |
|              | 2020 | 70.76  | 0.74 | 23.95 | 67.50  | 73.68  | 45.23 | 7.72  | -16% | 11%  | -13% | -6%  | -20% | -17% | 6%   |
|              | 2021 | 47.33  | 0.46 | 13.22 | 89.15  | 44.10  | 24.52 | 7.57  | -33% | -38% | -45% | 32%  | -40% | -46% | -2%  |
|              | 2017 | 89.69  | 0.93 | 34.91 | 70.37  | 104.71 | 57.42 | 14.81 |      |      |      |      |      |      |      |
| Zhengzhou    | 2018 | 90.10  | 0.79 | 32.87 | 72.79  | 105.13 | 57.87 | 12.52 | 0%   | -15% | -6%  | 3%   | 0%   | 1%   | -16% |
|              | 2019 | 81.76  | 0.65 | 26.66 | 69.29  | 89.80  | 52.69 | 7.07  | -9%  | -18% | -19% | -5%  | -15% | -9%  | -44% |
|              | 2020 | 68.64  | 0.72 | 23.23 | 65.47  | 71.47  | 43.87 | 7.49  | -16% | 11%  | -13% | -6%  | -20% | -17% | 6%   |
|              | 2021 | 45.91  | 0.45 | 12.82 | 86.48  | 42.78  | 23.78 | 7.34  | -33% | -38% | -45% | 32%  | -40% | -46% | -2%  |

|        |      |       |      |       |       |        |       |       |      |      |      |      |      |      |      |
|--------|------|-------|------|-------|-------|--------|-------|-------|------|------|------|------|------|------|------|
| Jiyuan | 2017 | 90.26 | 1.17 | 32.24 | 70.71 | 104.55 | 59.24 | 16.16 |      |      |      |      |      |      |      |
|        | 2018 | 93.64 | 0.93 | 28.11 | 75.94 | 109.22 | 57.25 | 12.03 | 4%   | -21% | -13% | 7%   | 4%   | -3%  | -26% |
|        | 2019 | 87.66 | 0.79 | 26.68 | 72.91 | 95.46  | 55.14 | 9.64  | -6%  | -15% | -5%  | -4%  | -13% | -4%  | -20% |
|        | 2020 | 82.87 | 0.80 | 25.51 | 64.34 | 80.39  | 53.69 | 8.75  | -5%  | 1%   | -4%  | -12% | -16% | -3%  | -9%  |
|        | 2021 | 51.01 | 0.60 | 11.57 | 87.08 | 55.84  | 22.51 | 6.45  | -38% | -25% | -55% | 35%  | -31% | -58% | -26% |
